# Supplementary material for: Ultra-thin NiS nanosheets as advanced electrode for high energy density supercapacitors
Source: Royal Society of Chemistry journal article supplement (doi:10.1039/c9ra09486e), 2020-01-01
Supplement: c9ra09486e1.pdf [file c9ra09486e1.pdf]

## Ultrathin NiS Nanosheets as Advanced Electrode for High Energy Density Supercapacitors

Hailong Yan,<sup>a,b</sup> Kejia Zhu,<sup>a,b</sup> Xu Liu,<sup>a,b</sup> Yinghui Wang,<sup>a,b</sup> Yangbo Wang,<sup>a,b</sup> Deyang Zhang,<sup>a,b</sup> Yang Lu,<sup>a,b</sup> Tao Peng,<sup>a,b</sup> Yunxin Liu<sup>c</sup>, and Yongsong Luo<sup>\*a,b</sup>

<sup>a</sup> School of Physics and Electronic Engineering, Xinyang Normal University, Xinyang 464000, P. R. China.

<sup>b</sup>Key Laboratory of Microelectronics and Energy of Henan Province, Xinyang Normal University, Xinyang 464000, P. R. China.

<sup>c</sup> Department of Physics and Electronic Science, Hunan University of Science and Technology, Xiangtan 411201, China

---

\* To whom correspondence should be addressed: Tel./fax: +86 376 6390801, E-mail: [eysluo@163.com](mailto:eysluo@163.com) (Y. S. Luo).

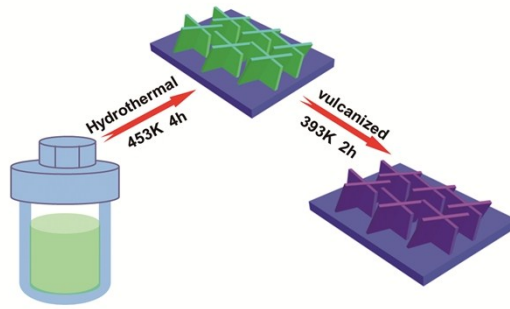

**Fig. S1.** Schematic illustration of the growth process of NiS nanosheets on Ni foam.

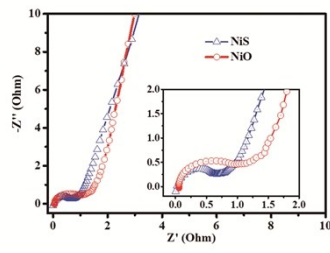

**Fig. S2** The electrochemical impedance spectra (EIS) of the NiS and NiO nanosheets.

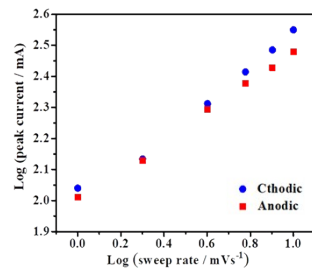

**Fig. S3.** Log ( $i$ ) versus log ( $v$ ) profile.

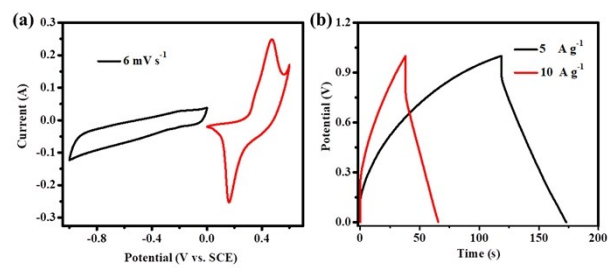

**Fig. S4.** CV and CD curves of AC electrodes.
